# Supplementary material for: Synthesis, characterization, DNA interaction, molecular docking, and α-amylase and α-glucosidase inhibition studies of a water soluble Zn(ii) phthalocyanine
Source: Royal Society of Chemistry journal article supplement (doi:10.1039/d4dt01138d), 2024-01-01
Supplement: d4dt01138d1.pdf [file d4dt01138d1.pdf]

## SUPPLEMENTARY MATERIALS

### **Synthesis, characterization, DNA interaction, molecular docking, $\alpha$ -amylase and $\alpha$ -glucosidase inhibition studies of a water soluble Zn(II) phthalocyanine**

Nagihan Saglam Ertunga <sup>1,\*</sup>, Ece Tugba Saka <sup>1</sup>, Tugba Taskin-Tok <sup>2,3</sup>,

<sup>4</sup>Kadriye Inan Bektas, Melike Yildirim Akatin <sup>5</sup>

<sup>1</sup> Karadeniz Technical University, Faculty of Science, Department of Chemistry, Trabzon, Türkiye

<sup>2</sup> Gaziantep University, Faculty of Arts and Sciences, Department of Chemistry, 27310-Gaziantep, Türkiye

<sup>3</sup> Gaziantep University, Institute of Health Sciences, Department of Bioinformatics and Computational Biology, Gaziantep, Türkiye

<sup>4</sup> Karadeniz Technical University, Faculty of Science, Department of Molecular Biology and Genetics, Trabzon, Türkiye

<sup>5</sup> Karadeniz Technical University, Macka Vocational School, Trabzon, Türkiye

## **Abbreviations**

H<sub>2</sub>O<sub>2</sub> : Hydrogen peroxide

AA : Ascorbic acid

ME : 2-Mercaptoethanol

DMSO : Dimethyl sulfoxide

NaN<sub>3</sub> : Sodium azide

SOD : Superoxide dismutase

## **2. Materials and Methods**

### *2.1. Materials*

The reagents and chemicals were purchased from Merck and Sigma-Aldrich and used without further purification. The IR spectra were recorded on a Perkin Elmer 1600 FT-IR spectrophotometer using KBr pellets. Spectrophotometric tests were performed using Perkin Elmer Lambda 25 UV–Vis Spectrometer. Deoxyribonucleic acid sodium salt from calf thymus (CT-DNA) was purchased from Sigma-Aldrich. pBR322 was obtained from Prof. Dr. Ali Osman Beldüz (Karadeniz Technical University, Faculty of Science, Department of Biology, Trabzon, Türkiye). Plasmid DNA and CT-DNA concentrations were measured by using Thermo Scientific NonoDrop™ 2000 Microvolume Spectrophotometer. The denaturation profiles of CT-DNA and CT-DNA- ZnPc-2 solutions were evaluated using a Cary 100 Bio UV/VIS spectrophotometer equipped with a Peltier thermostatted 6×6 multicell changer and a temperature controller with an in situ temperature probe (Varian).

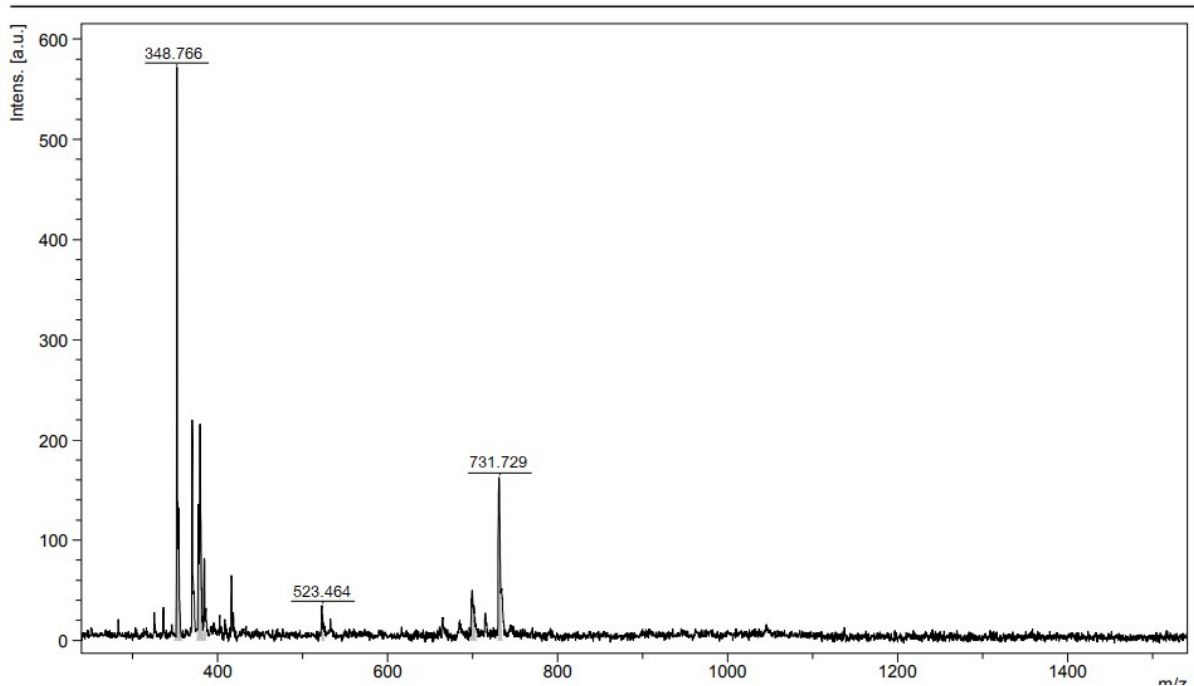

Supplementary Figure 1. MALDI-TOF spectrum of **ZnPc-2**

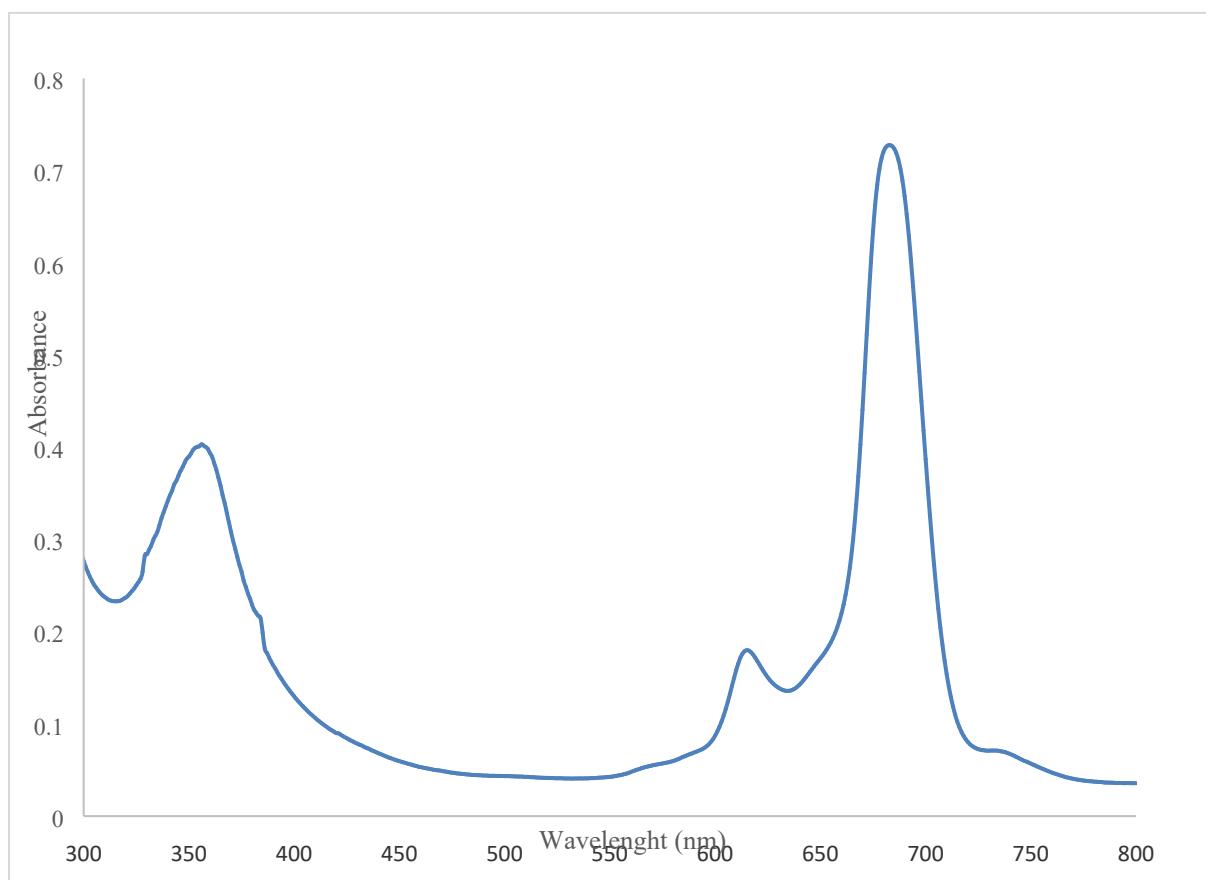

Supplementary Figure 2. UV-Vis spectrum of **ZnPc-2** in DMSO

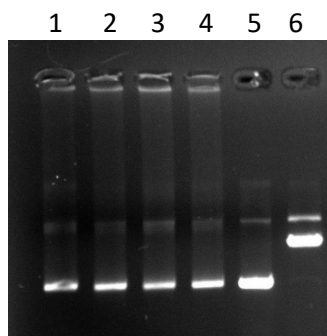

Supplementary Figure 3. pBR322 DNA cleavage activity of ZnPc-2 complex in the presence of some reducing/oxidizing agents. Lane 1; pBR322 (240 ng) + ZnPc-2(10  $\mu$ M), Lane 2; pBR322 (240 ng) + ZnPc-2 (10  $\mu$ M) + H<sub>2</sub>O<sub>2</sub> (1 mM), Lane 3; pBR322 (240 ng) + ZnPc-2 (10  $\mu$ M) + AA (1 mM), Lane 4; pBR322 (240 ng) + ZnPc-2 (10  $\mu$ M) + ME (1 mM), Lane 5; pBR322 (240 ng), Lane 6; pBR322 (240 ng)-*Eco*RI.

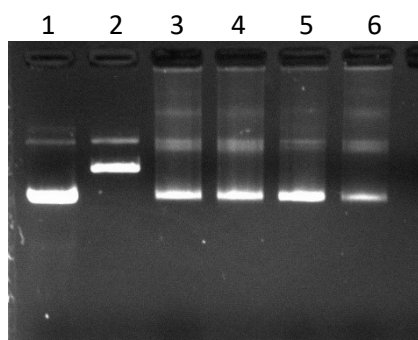

Supplementary Figure 4. Agarose gel electrophoresis pattern for the cleavage of pBR322 by ZnPc-2 in the presence of standard radical scavengers. Lane 1; pBR322 (240 ng), Lane 2; pBR322 (240 ng)-*Eco*RI, Lane 3; pBR322 (240 ng) + ZnPc-2 (10  $\mu$ M), Lane 4; pBR322 (240 ng) + ZnPc-2 (10  $\mu$ M) + DMSO (10 mM), Lane 5; pBR322 (240 ng) + ZnPc-2 (10  $\mu$ M) + NaN<sub>3</sub> (10 mM), Lane 6; pBR322 (240 ng) + ZnPc-2 (10  $\mu$ M) + SOD (10 U).

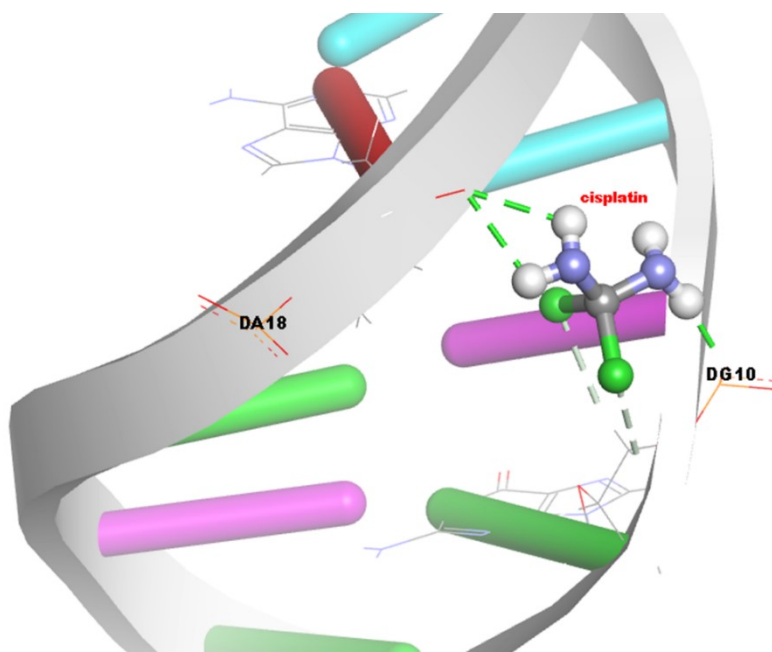

Supplementary Figure 5. Docking conformation and interactions of cisplatin with DNA.

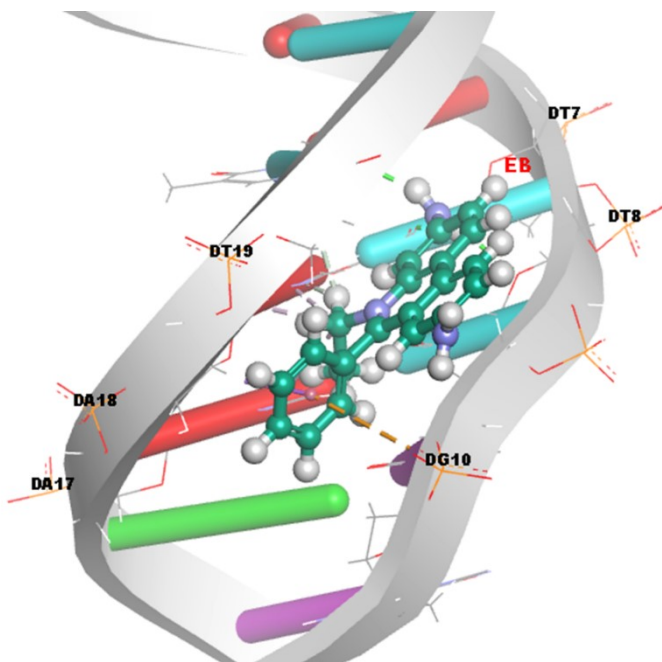

Supplementary Figure 6. Docking conformation and interactions of ethidium bromide (EB) with DNA.

Supplementary Table 1. Interactions types and distances of the compound **ZnPc-2** against DNA, ethidium bromide (EB) and cisplatin as positive compounds of the target, respectively.

| Distance Å | Bonding       | Binding site of target (DNA ) | Binding site of ligand (ZnPc-2) |
|------------|---------------|-------------------------------|---------------------------------|
| 5.5407     | Electrostatic | A:DC9:OP1                     | :ZnPc-2:Zn                      |
| 3.9480     | Electrostatic | B:DT20:OP1                    | :ZnPc-2:Zn                      |
| 4.3635     | Electrostatic | A:DG10:OP1                    | :ZnPc-2:N                       |
| 3.8554     | Electrostatic | B:DT19:OP1                    | :ZnPc-2:N                       |
| 5.5173     | Electrostatic | B:DT20:OP1                    | :ZnPc-2:N                       |
| 5.4063     | Electrostatic | B:DC21:OP2                    | :ZnPc-2:N                       |

|                   |                |                                      |                                            |
|-------------------|----------------|--------------------------------------|--------------------------------------------|
| 5.2324            | Electrostatic  | A:DT8:OP1                            | :ZnPc-2:N                                  |
| 5.0046            | Electrostatic  | B:DC21:OP1                           | :ZnPc-2:N                                  |
| 2.3451            | Hydrogen Bond  | B:DT20:H5'2                          | :ZnPc-2:N                                  |
| 2.3603            | Hydrogen Bond  | B:DA18:O3'                           | :ZnPc-2:H32                                |
| 2.3184            | Hydrogen Bond  | B:DA18:O3'                           | :ZnPc-2:H35                                |
| 1.7864            | Hydrogen Bond  | B:DT19:OP1                           | :ZnPc-2:H37                                |
| 2.1986            | Hydrogen Bond  | A:DG10:OP1                           | :ZnPc-2:H40                                |
| 1.9822            | Hydrogen Bond  | A:DT7:O3'                            | :ZnPc-2:H74                                |
| 3.7922            | Electrostatic  | B:DT20:OP1                           | :ZnPc-2                                    |
| 4.4550            | Electrostatic  | B:DT20:OP2                           | :ZnPc-2                                    |
| 4.7454            | Electrostatic  | B:DT20:OP2                           | :ZnPc-2                                    |
| 2.3418            | Hydrophobic    | B:DT19:H4'                           | :ZnPc-2                                    |
| <b>Distance Å</b> | <b>Bonding</b> | <b>Binding site of target (DNA )</b> | <b>Binding site of ligand (EB )</b>        |
| 2.1297            | Hydrogen Bond  | B:DT19:O2                            | :EB:H19                                    |
| 2.3222            | Hydrogen Bond  | A:DT7:O2                             | :EB:H20                                    |
| 2.2932            | Hydrogen Bond  | A:DT8:O4'                            | :EB:H20                                    |
| 2.0460            | Hydrogen Bond  | B:DA18:N3                            | :EB:H12                                    |
| 2.6319            | Hydrogen Bond  | B:DT19:O4'                           | :EB:H12                                    |
| 4.0589            | Electrostatic  | A:DG10:OP1                           | :EB                                        |
| 2.6028            | Hydrophobic    | B:DA18:H4'                           | :EB                                        |
| 4.6736            | Hydrophobic    | A:DC9                                | :EB:C21                                    |
| 4.2178            | Hydrophobic    | B:DA17                               | :EB:C21                                    |
| 4.7243            | Hydrophobic    | B:DA18                               | :EB:C21                                    |
| 4.3887            | Hydrophobic    | B:DA18                               | :EB:C21                                    |
| <b>Distance Å</b> | <b>Bonding</b> | <b>Binding site of target (DNA )</b> | <b>Binding site of ligand (cisplatin )</b> |
| 1.8182            | Hydrogen Bond  | A:DG10:OP1                           | cisplatin:H6                               |
| 2.4486            | Hydrogen Bond  | B:DA18:O3'                           | cisplatin:H8                               |
| 2.4875            | Hydrogen Bond  | B:DA18:O3'                           | cisplatin:H9                               |
| 2.6658            | Hydrogen Bond  | A:DG10:H5'1                          | cisplatin:Cl5                              |
| 2.6813            | Hydrogen Bond  | A:DG10:H5'2                          | cisplatin:Cl2                              |
